# Supplementary material
Source: Research Square preprint supplement (doi:10.21203/rs.3.rs-9129803/v1)
Supplement: Supplementary file 1 [file a26ebb477ad2b3e61cb0dbe8.docx]

Supplementary Table 1

This table shows the intragroup comparison of right ventricular—free wall strain measurements for each right heart failure (RHF) group of each examination.

| Comparison | Group | Estimate | Std. Error | DF | t-ratio | Adj. p-value |
| --- | --- | --- | --- | --- | --- | --- |
| Ex 1 – Ex 2 | eaRHF | -1.87 | 1.21 | 142.50 | -1.54 | 0.54 |
| Ex 1 – Ex 3 | eaRHF | 1.37 | 1.36 | 150.11 | 1.01 | 0.85 |
| Ex 1 – Ex 4 | eaRHF | 1.69 | 1.55 | 153.97 | 1.09 | 0.81 |
| Ex 1 – Ex 5 | eaRHF | -0.66 | 1.70 | 154.87 | -0.39 | 1.00 |
| Ex 2- Ex 3 | eaRHF | 3.23 | 1.36 | 150.11 | 2.38 | 0.13 |
| Ex 2 – Ex 4 | eaRHF | 3.55 | 1.55 | 153.97 | 2.29 | 0.15 |
| Ex 2- Ex 5 | eaRHF | 1.20 | 1.70 | 154.87 | 0.71 | 0.95 |
| Ex 3 - Ex 4 | eaRHF | 0.32 | 1.61 | 147.70 | 0.20 | 1.00 |
| Ex 3 – Ex 5 | eaRHF | -2.03 | 1.76 | 149.56 | -1.15 | 0.78 |
| Ex 4 – Ex 5 | eaRHF | -2.35 | 1.86 | 144.93 | -1.27 | 0.71 |
| Ex 1 – Ex 2 | No RHF | -3.47 | 0.98 | 143.05 | -3.53 | 0.01 |
| Ex 1 – Ex 3 | No RHF | -3.03 | 1.05 | 146.66 | -2.88 | 0.04 |
| Ex 1 – Ex 4 | No RHF | -1.22 | 1.15 | 150.20 | -1.06 | 0.83 |
| Ex 1 – Ex 5 | No RHF | -2.31 | 1.31 | 152.55 | -1.76 | 0.40 |
| Ex 2- Ex 3 | No RHF | 0.45 | 1.06 | 147.46 | 0.42 | 0.99 |
| Ex 2 – Ex 4 | No RHF | 2.26 | 1.16 | 151.21 | 1.94 | 0.30 |
| Ex 2- Ex 5 | No RHF | 1.17 | 1.32 | 152.35 | 0.89 | 0.90 |
| Ex 3 - Ex 4 | No RHF | 1.81 | 1.21 | 150.48 | 1.49 | 0.57 |
| Ex 3 – Ex 5 | No RHF | 0.72 | 1.36 | 152.43 | 0.53 | 0.98 |
| Ex 4 – Ex 5 | No RHF | -1.09 | 1.41 | 147.86 | -0.78 | 0.94 |
| Ex 1 – Ex 2 | epRHF | -0.86 | 1.60 | 144.82 | -0.54 | 0.98 |
| Ex 1 – Ex 3 | epRHF | 1.29 | 1.55 | 142.50 | 0.83 | 0.92 |
| Ex 1 – Ex 4 | epRHF | 0.29 | 2.05 | 153.32 | 0.14 | 1.00 |
| Ex 1 – Ex 5 | epRHF | 1.72 | 2.51 | 155.29 | 0.69 | 0.96 |
| Ex 2- Ex 3 | epRHF | 2.15 | 1.60 | 144.82 | 1.34 | 0.66 |
| Ex 2 – Ex 4 | epRHF | 1.15 | 2.07 | 151.72 | 0.56 | 0.98 |
| Ex 2- Ex 5 | epRHF | 2.58 | 2.53 | 154.19 | 1.02 | 0.85 |
| Ex 3 - Ex 4 | epRHF | -1.00 | 2.05 | 153.32 | -0.49 | 0.99 |
| Ex 3 – Ex 5 | epRHF | 0.43 | 2.51 | 155.29 | 0.17 | 1.00 |
| Ex 4 – Ex 5 | epRHF | 1.43 | 2.72 | 147.24 | 0.53 | 0.98 |

eaRHF – early, acute right heart failure, epRHF – early, postoperative right heart failure, Ex- Examination, Std. – Standard, DF – degree of freedom, adj. – adjusted

Supplemental Table 2

This table shows the intragroup comparison of global right ventricular longitudinal strain measurements for each right heart failure (RHF) group of each examination.

| Comparison | Group | Estimate | Std. Error | DF | t-ratio | Adj. p-value |
| --- | --- | --- | --- | --- | --- | --- |
| Ex 1 – Ex 2 | eaRHF | -0.76 | 1.04 | 142.49 | -0.73 | 0.95 |
| Ex 1 – Ex 3 | eaRHF | 2.58 | 1.16 | 150.00 | 2.21 | 0.18 |
| Ex 1 – Ex 4 | eaRHF | 4.38 | 1.33 | 153.78 | 3.29 | 0.01 |
| Ex 1 – Ex 5 | eaRHF | 0.14 | 1.46 | 154.66 | 0.09 | 1.00 |
| Ex 2- Ex 3 | eaRHF | 3.34 | 1.16 | 150.00 | 2.87 | 0.04 |
| Ex 2 – Ex 4 | eaRHF | 5.14 | 1.33 | 153.78 | 3.87 | <0.01 |
| Ex 2- Ex 5 | eaRHF | 0.90 | 1.46 | 154.66 | 0.62 | 0.97 |
| Ex 3 - Ex 4 | eaRHF | 1.80 | 1.38 | 147.59 | 1.30 | 0.69 |
| Ex 3 – Ex 5 | eaRHF | -2.44 | 1.51 | 149.41 | -1.61 | 0.49 |
| Ex 4 – Ex 5 | eaRHF | -4.24 | 1.59 | 144.86 | -2.66 | 0.06 |
| Ex 1 – Ex 2 | No RHF | -1.70 | 0.84 | 143.03 | -2.01 | 0.27 |
| Ex 1 – Ex 3 | No RHF | -0.92 | 0.90 | 146.58 | -1.02 | 0.84 |
| Ex 1 – Ex 4 | No RHF | 1.36 | 0.99 | 150.07 | 1.37 | 0.65 |
| Ex 1 – Ex 5 | No RHF | -0.25 | 1.12 | 152.35 | -0.22 | 1.00 |
| Ex 2- Ex 3 | No RHF | 0.77 | 0.91 | 147.37 | 0.85 | 0.92 |
| Ex 2 – Ex 4 | No RHF | 3.05 | 1.00 | 151.06 | 3.06 | 0.02 |
| Ex 2- Ex 5 | No RHF | 1.44 | 1.13 | 152.16 | 1.28 | 0.70 |
| Ex 3 - Ex 4 | No RHF | 2.28 | 1.04 | 150.32 | 2.19 | 0.19 |
| Ex 3 – Ex 5 | No RHF | 0.67 | 1.17 | 152.23 | 0.57 | 0.98 |
| Ex 4 – Ex 5 | No RHF | -1.61 | 1.21 | 147.74 | -1.33 | 0.67 |
| Ex 1 – Ex 2 | epRHF | 0.13 | 1.37 | 144.78 | 0.10 | 1.00 |
| Ex 1 – Ex 3 | epRHF | 1.61 | 1.33 | 142.49 | 1.21 | 0.75 |
| Ex 1 – Ex 4 | epRHF | 1.37 | 1.76 | 153.13 | 0.78 | 0.94 |
| Ex 1 – Ex 5 | epRHF | 3.31 | 2.15 | 155.04 | 1.53 | 0.54 |
| Ex 2- Ex 3 | epRHF | 1.48 | 1.37 | 144.78 | 1.07 | 0.82 |
| Ex 2 – Ex 4 | epRHF | 1.24 | 1.78 | 151.55 | 0.70 | 0.96 |
| Ex 2- Ex 5 | epRHF | 3.17 | 2.17 | 153.95 | 1.46 | 0.59 |
| Ex 3 - Ex 4 | epRHF | -0.24 | 1.76 | 153.13 | -0.14 | 1.00 |
| Ex 3 – Ex 5 | epRHF | 1.70 | 2.15 | 155.04 | 0.79 | 0.93 |
| Ex 4 – Ex 5 | epRHF | 1.94 | 2.33 | 147.13 | 0.83 | 0.92 |

eaRHF – early, acute right heart failure, epRHF – early post-implant right heart failure, Ex- Examination, Std. – Standard, DF – degree of freedom, adj. – adjusted

Supplemental Table 3

Inter-group comparison according to right heart failure (RHF) status. There were no significant differences in right ventricular–free wall strain results between the groups.

| Comparison | Timepoint | Estimate | Std. Error | DF | t-ratio | Adj. p-value |
| --- | --- | --- | --- | --- | --- | --- |
| eaRHF - No RHF | 1 | 1.62 | 1.43 | 134.00 | 1.14 | 0.49 |
| eaRHF - epRHF | 1 | -1.16 | 1.81 | 134.00 | -0.64 | 0.80 |
| No RHF - epRHF | 1 | -2.79 | 1.68 | 134.00 | -1.66 | 0.22 |
| eaRHF – No RHF | 2 | 0.02 | 1.43 | 135.44 | 0.01 | 1.00 |
| eaRHF - epRHF | 2 | -0.16 | 1.85 | 139.65 | -0.09 | 1.00 |
| No RHF - epRHF | 2 | -0.18 | 1.73 | 141.45 | -0.10 | 0.99 |
| eaRHF – No RHF | 3 | -2.77 | 1.60 | 160.26 | -1.73 | 0.20 |
| eaRHF - epRHF | 3 | -1.24 | 1.91 | 146.59 | -0.65 | 0.79 |
| Non RHF- epRHF | 3 | 1.53 | 1.73 | 141.20 | 0.89 | 0.65 |
| eaRHF – No RHF | 4 | -1.28 | 1.83 | 183.07 | -0.70 | 0.76 |
| eaRHF - epRHF | 4 | -2.56 | 2.45 | 189.06 | -1.05 | 0.55 |
| No RHF - epRHF | 4 | -1.28 | 2.23 | 187.84 | -0.57 | 0.83 |
| eaRHF - No RHF | 5 | -0.02 | 2.06 | 193.65 | -0.01 | 1.00 |
| eaRHF - epRHF | 5 | 1.22 | 2.93 | 195.97 | 0.42 | 0.91 |
| No RHF - epRHF | 5 | 1.24 | 2.74 | 195.92 | 0.45 | 0.89 |

eaRHF – early, acute right heart failure, epRHF – early, postoperative right heart failure

Supplemental Table 4

Inter-group comparison according to right heart failure (RHF) status. There were no significant differences in right ventricular global longitudinal strain results between the groups.

| Comparison | Timepoint | Estimate | Std. Error | DF | t-ratio | Adj. p-value |
| --- | --- | --- | --- | --- | --- | --- |
| eaRHF - No RHF | 1 | 1.62 | 1.23 | 132.71 | 0.55 | 0.85 |
| eaRHF - epRHF | 1 | -1.16 | 1.56 | 132.71 | -0.56 | 0.84 |
| No RHF - epRHF | 1 | -2.79 | 1.45 | 132.71 | -1.08 | 0.53 |
| eaRHF – No RHF | 2 | 0.02 | 1.24 | 134.14 | -0.21 | 0.98 |
| eaRHF - epRHF | 2 | -0.16 | 1.60 | 138.38 | 0.01 | 1.00 |
| No RHF - epRHF | 2 | -0.18 | 1.49 | 140.18 | 0.18 | 0.98 |
| eaRHF – No RHF | 3 | -2.77 | 1.38 | 159.17 | -2.04 | 0.11 |
| eaRHF - epRHF | 3 | -1.24 | 1.64 | 145.36 | -1.12 | 0.50 |
| Non RHF- epRHF | 3 | 1.53 | 1.49 | 139.92 | 0.65 | 0.79 |
| eaRHF – No RHF | 4 | -1.28 | 1.57 | 182.41 | -1.49 | 0.30 |
| eaRHF - epRHF | 4 | -2.56 | 2.11 | 188.60 | -1.85 | 0.16 |
| No RHF - epRHF | 4 | -1.28 | 1.92 | 187.33 | -0.81 | 0.70 |
| eaRHF - No RHF | 5 | -0.02 | 1.77 | 193.40 | 0.16 | 0.99 |

eaRHF – early, acute right heart failure, epRHF – early, postoperative right heart failure
